# Supplementary material
Source: Springer Nature journal article supplement (https://www.springermedizin.de/resource/supplementary/12885_2014_4791_MOESM3_ESM.pdf/9467270)

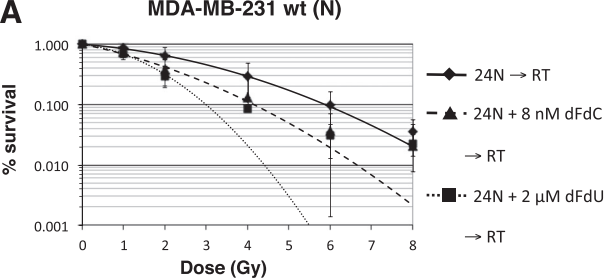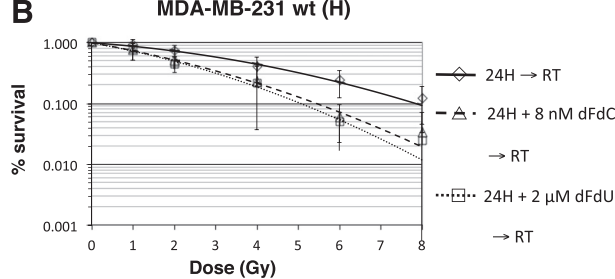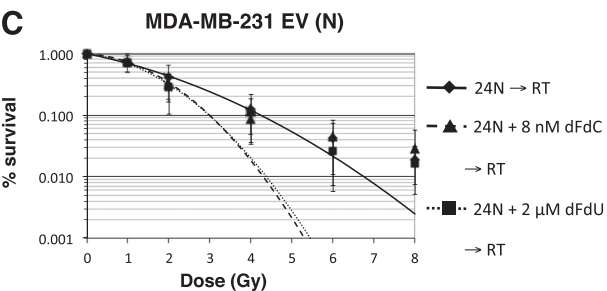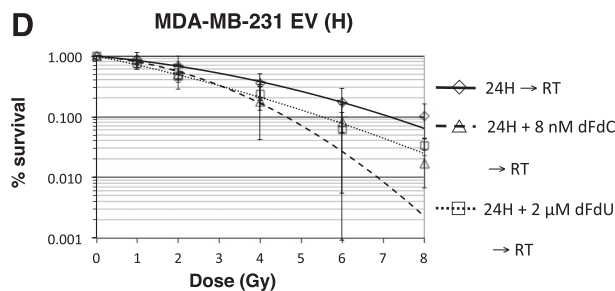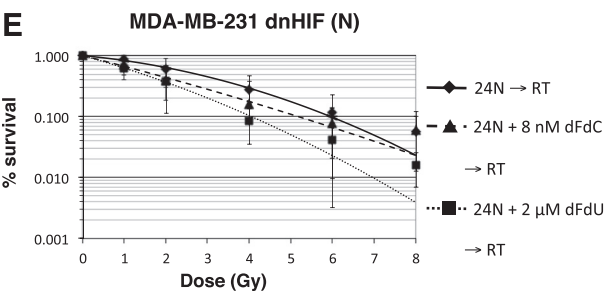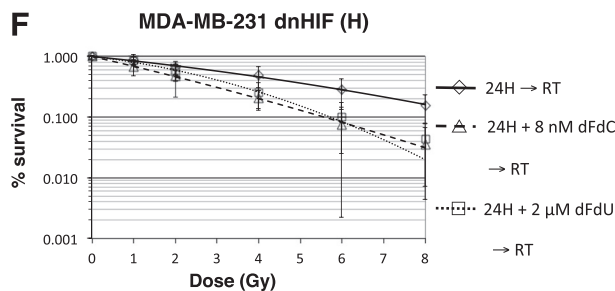

Supplement: MOESM3 [file 9467270]
